# Supplementary figures and images for: Effects of a low carbohydrate diet on energy expenditure during weight loss maintenance: randomized trial
Source: PubMed Central journal article supplement — BMJ. 2018 Nov 14;363:k4583. doi: 10.1136/bmj.k4583 (PMC6233655; doi:10.1136/bmj.k4583), 2018-11-14

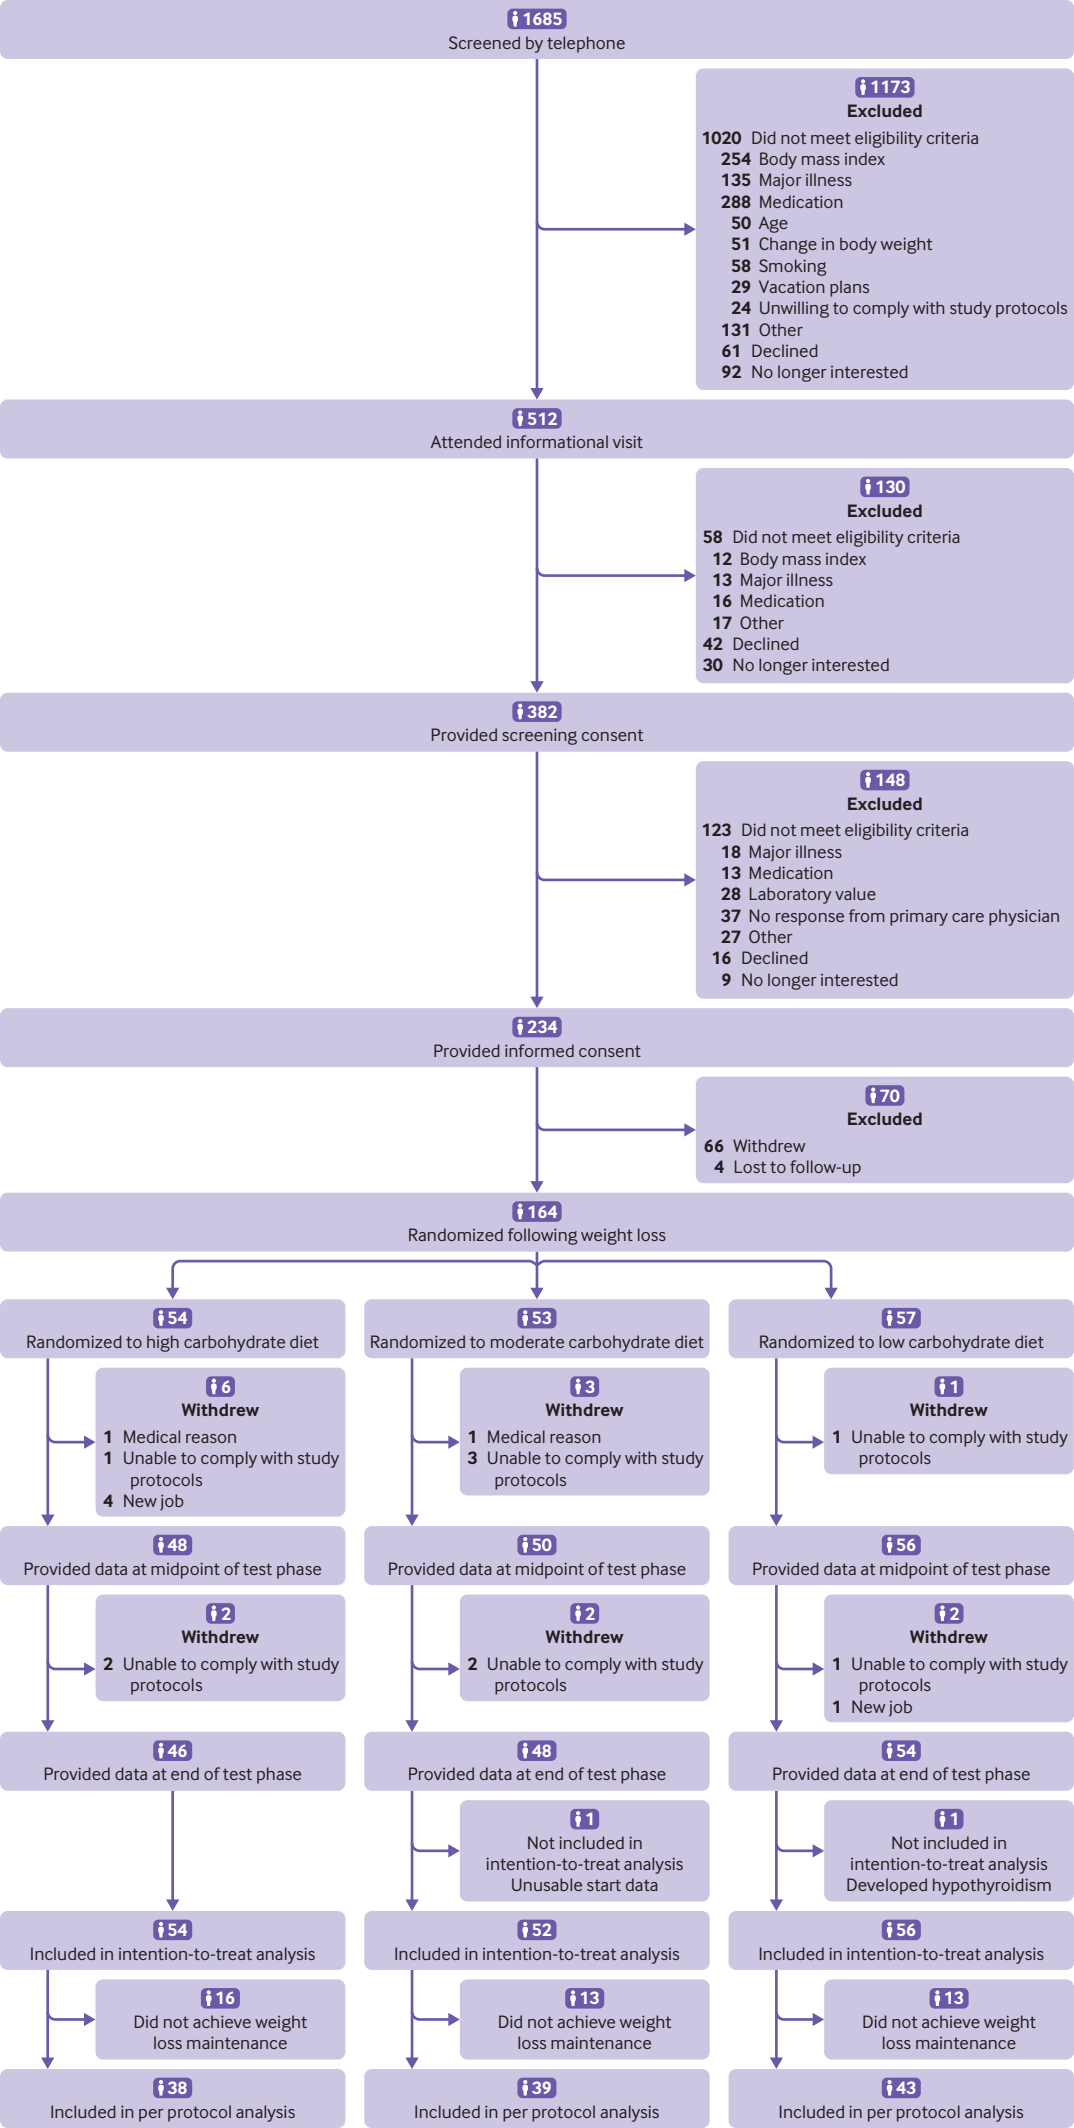

Supplement: ebbc046192.wf1.pdf [file ebbc046192.wf1.pdf]
